# Supplementary material for: Vibrational energy relaxation of a diatomic molecule in a superfluid helium nanodroplet: influence of the nanodroplet size, interaction energy and energy gap
Source: Royal Society of Chemistry journal article supplement (doi:10.1039/d1cp03629g), 2021-01-01
Supplement: d1cp03629g1.pdf [file d1cp03629g1.pdf]

## SUPPORTING INFORMATION

### Vibrational energy relaxation of a diatomic molecule in a superfluid helium nanodroplet. Influence of the nanodroplet size, interaction energy and energy gap

Miquel Blancafort-Jorquera and Miguel González\*

Departament de Ciència dels Materials i Química Física and IQTC, Universitat de Barcelona, Martí i Franquès, 1-11, 08028 Barcelona, Spain

## CONTENTS

|                                                                                                                                                                                                                                       |        |
|---------------------------------------------------------------------------------------------------------------------------------------------------------------------------------------------------------------------------------------|--------|
| <b>Table s1.</b> Energy contributions at $t=0$ for $\nu=1$ , as a function of $N$ .                                                                                                                                                   | page 2 |
| <b>Table s2.</b> Inverse of the relaxation times of $\nu=1$ and $\langle V_{01}^2 \rangle$ coupling term, as a function of the interaction potential energy ( $N=100$ ).                                                              | page 3 |
| <b>Table s3.</b> Inverse of the relaxation times of $\nu=1$ , $\langle V_{01}^2 \rangle$ coupling term and $\sqrt{x}$ , as a function of the vibrational frequency ( $N=100$ ).                                                       | page 3 |
| <b>Figure s1.</b> Energy increments involved in the VER from $\nu=1$ at the selected “I <sub>2</sub> -HeND” interaction potential energies and number of <sup>4</sup> He atoms of the nanodroplet, as a function of time ( $N=100$ ). | page 4 |
| <b>Figure s2.</b> Inverse of the global relaxation times, lifetimes and transition times of the $\nu=1$ excited state, as a function of the $\langle V_{01}^2 \rangle$ coupling term, for the selected $\nu_e$ ( $N=100$ ).           | page 5 |
| <b>Figure s3.</b> Inverse of the global relaxation times, lifetimes and transition times of the $\nu=1$ excited state, as a function of the $x^{1/2}$ term, for the selected $\nu_e$ ( $N=100$ ).                                     | page 6 |

\* Corresp. author: E-mail: [miguel.gonzalez@ub.edu](mailto:miguel.gonzalez@ub.edu); Fax: +34934021231.

**Table s1.** Energy ( $E$ ) contributions (in K) at  $t=0$  for  $I_2(\nu=1)@(^4\text{He})_N$ , as a function of  $N$ <sup>a</sup>

| $N$ | $E(\text{He})_N$ | $E$ per atom $(\text{He})_N$ | Kinetic $E(\text{He})_N$ | Lennard-Jones $E(\text{He})_N$ |
|-----|------------------|------------------------------|--------------------------|--------------------------------|
| 50  | 99.73            | 1.99                         | 185.39                   | -141.26                        |
| 100 | -102.45          | -1.02                        | 214.45                   | -403.94                        |
| 150 | -338.14          | -2.25                        | 230.49                   | -674.32                        |
| 200 | -588.94          | -2.94                        | 241.10                   | -952.21                        |

---

| $N$ | Interaction $E$              |                     |                      | Total $E I_2@(\text{He})_N$ |
|-----|------------------------------|---------------------|----------------------|-----------------------------|
|     | Correlation $E(\text{He})_N$ | $I_2-(\text{He})_N$ | Vibrational $E(I_2)$ |                             |
| 50  | 55.30                        | -664.09             | 459.96               | -104.40                     |
| 100 | 86.45                        | -739.99             | 459.96               | -382.48                     |
| 150 | 104.98                       | -767.58             | 459.96               | -645.76                     |
| 200 | 121.41                       | -782.70             | 459.96               | -911.68                     |

---

<sup>a</sup>  $E(\text{He})_N$  refers exclusively to the helium and includes several terms: kinetic energy, potential energy (Lennard-Jones potential energy function) and correlation energy.

**Table s2.** Inverse of the global relaxation times, lifetimes and transition times of the  $\nu=1$  excited state and  $\langle V_{01}^2 \rangle$  coupling terms for the five interaction potential energies considered ( $V=xV_{I_2-He}$ ) and  $N=100$ .<sup>a</sup>

| $x$  | $\langle V_{01}^2 \rangle$<br>(K <sup>2</sup> ) | 1/Global relax.<br>time<br>(ps <sup>-1</sup> ) | 1/Lifetime<br>(ps <sup>-1</sup> ) | 1/Transition<br>time<br>(ps <sup>-1</sup> ) |
|------|-------------------------------------------------|------------------------------------------------|-----------------------------------|---------------------------------------------|
| 0.50 | 0.15 (0.09)                                     | $7.66 \cdot 10^{-5}$ (0.22)                    | $1.03 \cdot 10^{-4}$ (0.21)       | $1.49 \cdot 10^{-4}$ (0.26)                 |
| 0.75 | 0.61 (0.39)                                     | $1.96 \cdot 10^{-4}$ (0.56)                    | $2.73 \cdot 10^{-4}$ (0.54)       | $3.50 \cdot 10^{-4}$ (0.60)                 |
| 1.00 | 1.56 (1.00)                                     | $3.48 \cdot 10^{-4}$ (1.00)                    | $5.01 \cdot 10^{-4}$ (1.00)       | $5.79 \cdot 10^{-4}$ (1.00)                 |
| 1.25 | 3.09 (1.98)                                     | $8.50 \cdot 10^{-4}$ (2.44)                    | $1.27 \cdot 10^{-3}$ (2.53)       | $1.34 \cdot 10^{-3}$ (2.31)                 |
| 1.50 | 5.98 (3.84)                                     | $1.56 \cdot 10^{-3}$ (4.49)                    | $2.42 \cdot 10^{-3}$ (4.83)       | $2.31 \cdot 10^{-3}$ (4.00)                 |

<sup>a</sup>  $\langle V_{01}^2 \rangle$  and the inverse of the relaxation times relative to the  $x=1.00$  reference case are given between parentheses.

**Table s3.** Inverse of the global relaxation times, lifetimes and transition times of the  $\nu=1$  excited state,  $\langle V_{01}^2 \rangle$  coupling terms and  $\sqrt{x}$  for the four vibrational frequencies  $\nu_e$  considered ( $\nu_e = x\nu_{e,I_2}$ ) and  $N=100$ .<sup>a</sup>

| $x$  | $\sqrt{x}$ | $\langle V_{01}^2 \rangle$<br>(K <sup>2</sup> ) | 1/Global relax.<br>time<br>(ps <sup>-1</sup> ) | 1/Lifetime<br>(ps <sup>-1</sup> ) | 1/Transition<br>time<br>(ps <sup>-1</sup> ) |
|------|------------|-------------------------------------------------|------------------------------------------------|-----------------------------------|---------------------------------------------|
| 0.75 | 0.87       | 1.16 (0.75)                                     | $9.74 \cdot 10^{-4}$ (2.80)                    | $1.41 \cdot 10^{-3}$ (2.82)       | $1.59 \cdot 10^{-3}$ (2.75)                 |
| 1.00 | 1.00       | 1.56 (1.00)                                     | $3.48 \cdot 10^{-4}$ (1.00)                    | $5.01 \cdot 10^{-4}$ (1.00)       | $5.79 \cdot 10^{-4}$ (1.00)                 |
| 1.25 | 1.12       | 1.93 (1.24)                                     | $1.87 \cdot 10^{-4}$ (0.54)                    | $2.64 \cdot 10^{-4}$ (0.53)       | $3.22 \cdot 10^{-4}$ (0.56)                 |
| 1.50 | 1.22       | 2.30 (1.48)                                     | $1.28 \cdot 10^{-4}$ (0.37)                    | $1.65 \cdot 10^{-4}$ (0.33)       | $2.23 \cdot 10^{-4}$ (0.38)                 |

<sup>a</sup>  $\langle V_{01}^2 \rangle$  and the inverse of the relaxation times relative to the  $x=1.00$  reference case are given between parentheses.

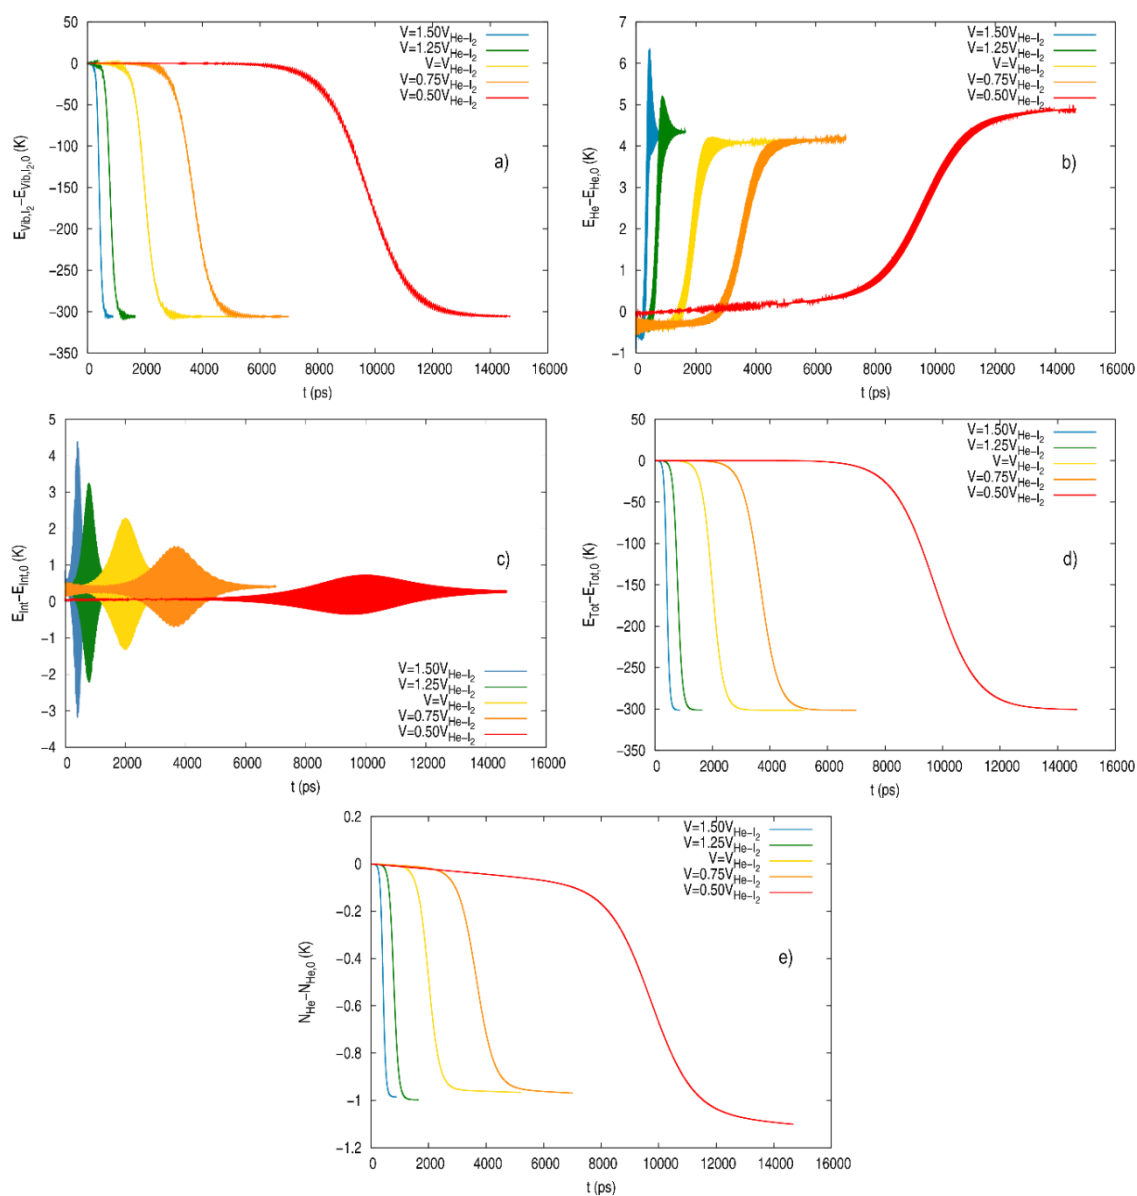

**Figure s1.** Energy increments involved in the VER from  $\nu=1$  for the five selected “I<sub>2</sub>-HeND” interaction potential energies and number of  $^4\text{He}$  atoms of the nanodroplet, as a function of time for  $N=100$ : a) vibrational energy of the molecule; b) helium energy of the nanodroplet; c) molecule-nanodroplet interaction energy; d) total energy of the system (I<sub>2</sub>@HeND); e) number of  $^4\text{He}$  atoms of the HeND.

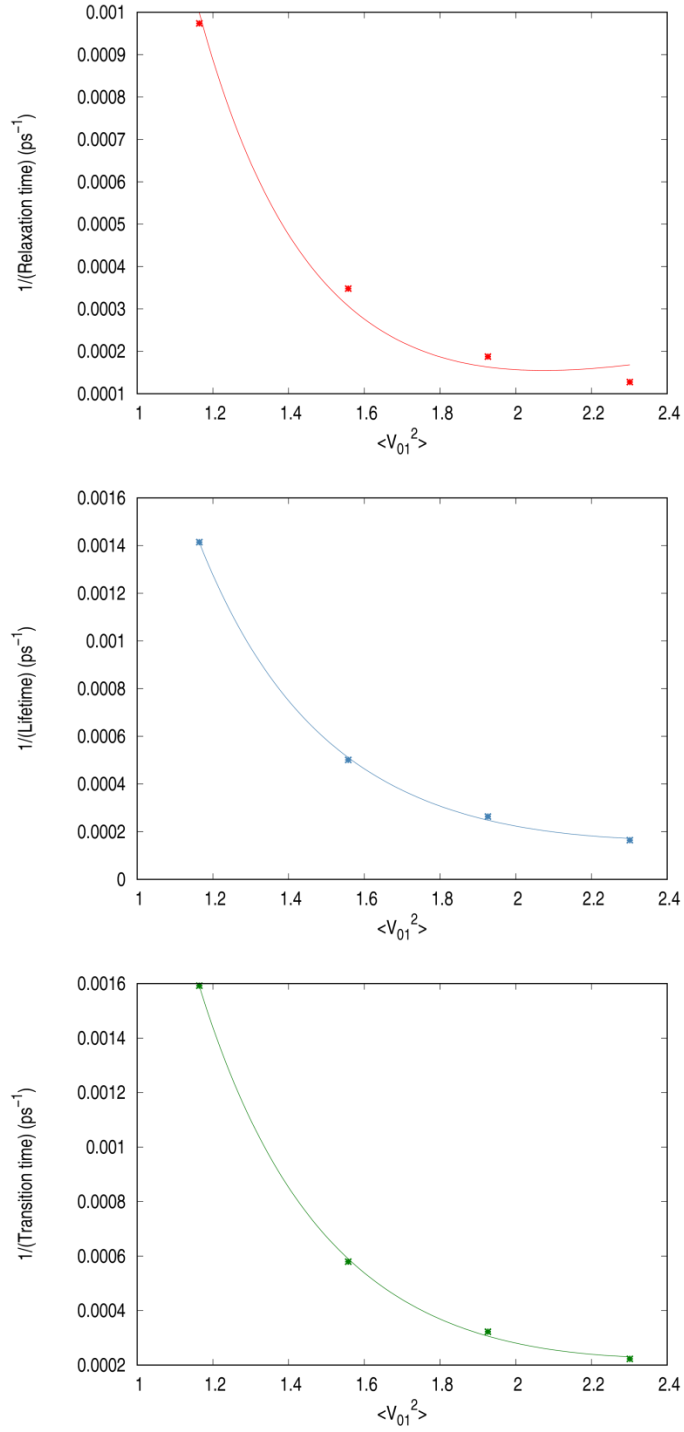

**Figure s2.** Inverse of the global relaxation time (top), lifetime (middle) and transition time (bottom) of the  $\nu=1$  excited state, as a function of the  $\langle V_{01}^2 \rangle$  coupling term for the vibrational frequencies selected ( $\nu_e = x\nu_{e,I_2}$ , with  $x=0.75, 1.00, 1.25$  and  $1.50$ ) and  $N=100$ . The coupling term increases with  $x$ .

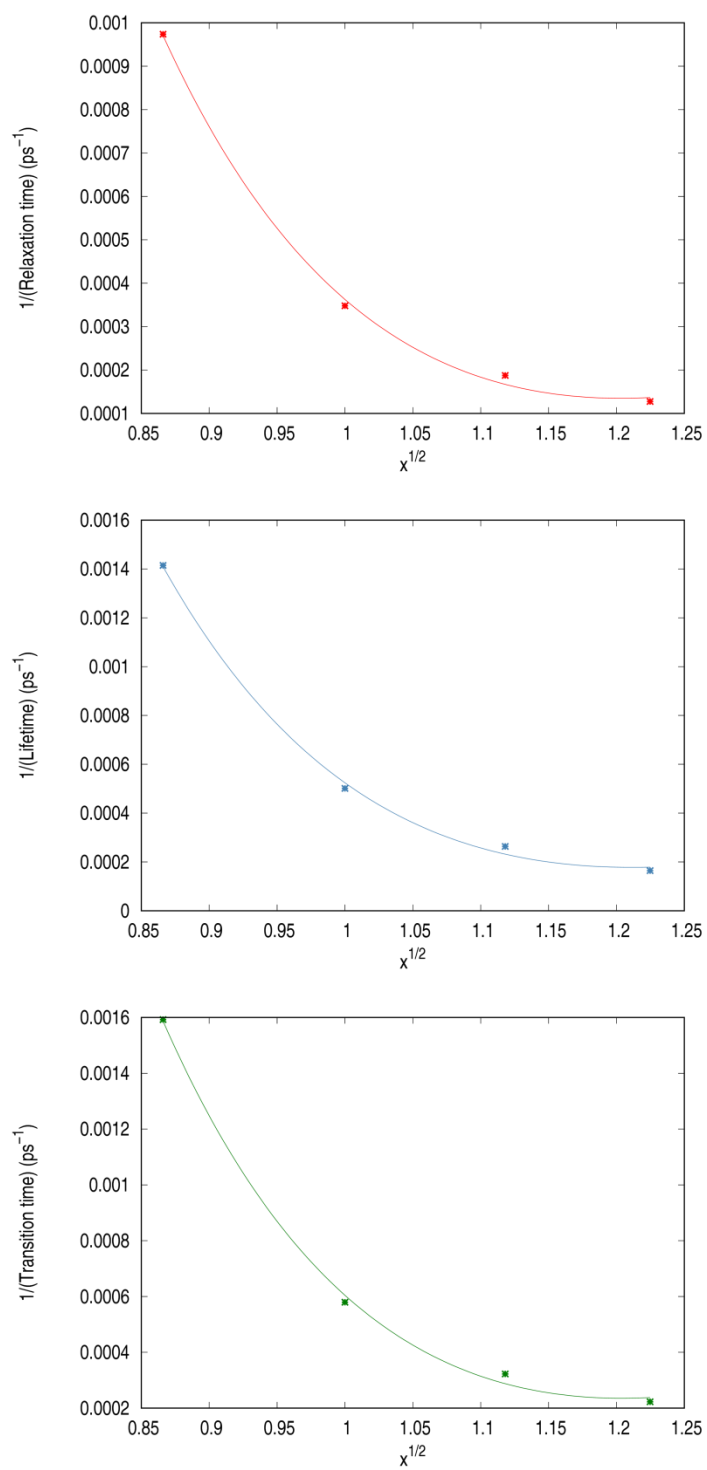

**Figure s3.** Inverse of the global relaxation time (top), lifetime (middle) and transition time (bottom) of the  $\nu=1$  excited state, as a function of the  $x^{1/2}$  term for the vibrational frequencies selected ( $\nu_e = x\nu_{e,I_2}$ , with  $x=0.75, 1.00, 1.25$  and  $1.50$ ) and  $N=100$ .
